# Supplementary material for: A simple, cost-effective and selective analysis of glucose via electrochemical impedance sensing based on copper and nitrogen co-doped carbon quantum dots
Source: Royal Society of Chemistry journal article supplement (doi:10.1039/d0nj01754j), 2020-01-01
Supplement: d0nj01754j1.pdf [file d0nj01754j1.pdf]

## Supporting information

### Simple, cost-effective and selective analysis of glucose via an electrochemical impedance sensor based on copper and nitrogen co-doped carbon quantum dots

Haiyan Wu<sup>a,b</sup>, Yu Yan<sup>b</sup>, Qingshuang Huang<sup>b</sup>, Guobin Liang<sup>b</sup>, Fengxian Qiu<sup>\*c</sup>, Zhaolian Ye<sup>\*b</sup>,  
Dan Liu<sup>b</sup>

- a. School of Environmental and Safety Engineering, Jiangsu University, Zhenjiang 212013, China.
- b. School of Chemical and Environmental Engineering, Jiangsu University of Technology,  
Changzhou 213001, China.
- c. School of Chemistry and Chemical Engineering, Jiangsu University, Zhenjiang 212013, China.

Table S1 The atomic composition of the Cu,N co-doped carbon quantum dots  
obtained from XPS spectra

| Element | Atomic/% |
|---------|----------|
| C1s     | 61.83    |
| O1s     | 24.72    |
| N1s     | 12.18    |
| Cu2p    | 1.27     |
